# Supplementary material
Source: publisher figshare collection journal article supplement (https://frontiersin.figshare.com/ndownloader/files/24552278)
Supplement: Supplementary file [file 24552278]

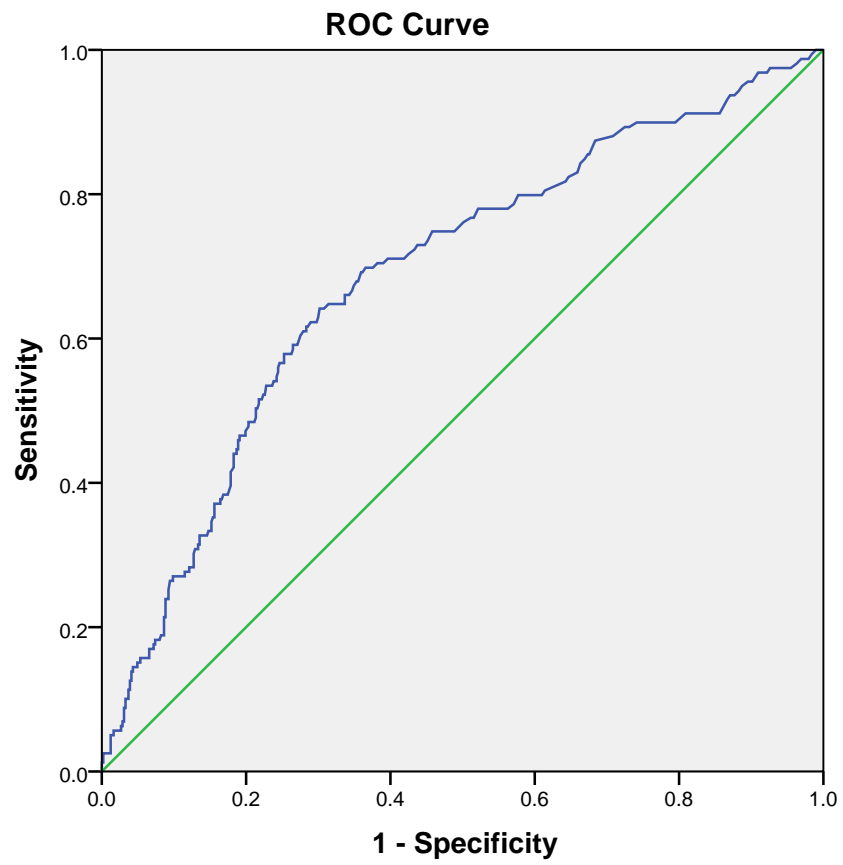

Diagonal segments are produced by ties.
